# Supplementary material
Source: PubMed Central journal article supplement (PMC4634101)
Supplement: supp_pp.15.01310_PP2015-01310_Supplemental_Data.pdf [file supp_pp.15.01310_PP2015-01310_Supplemental_Data.pdf]

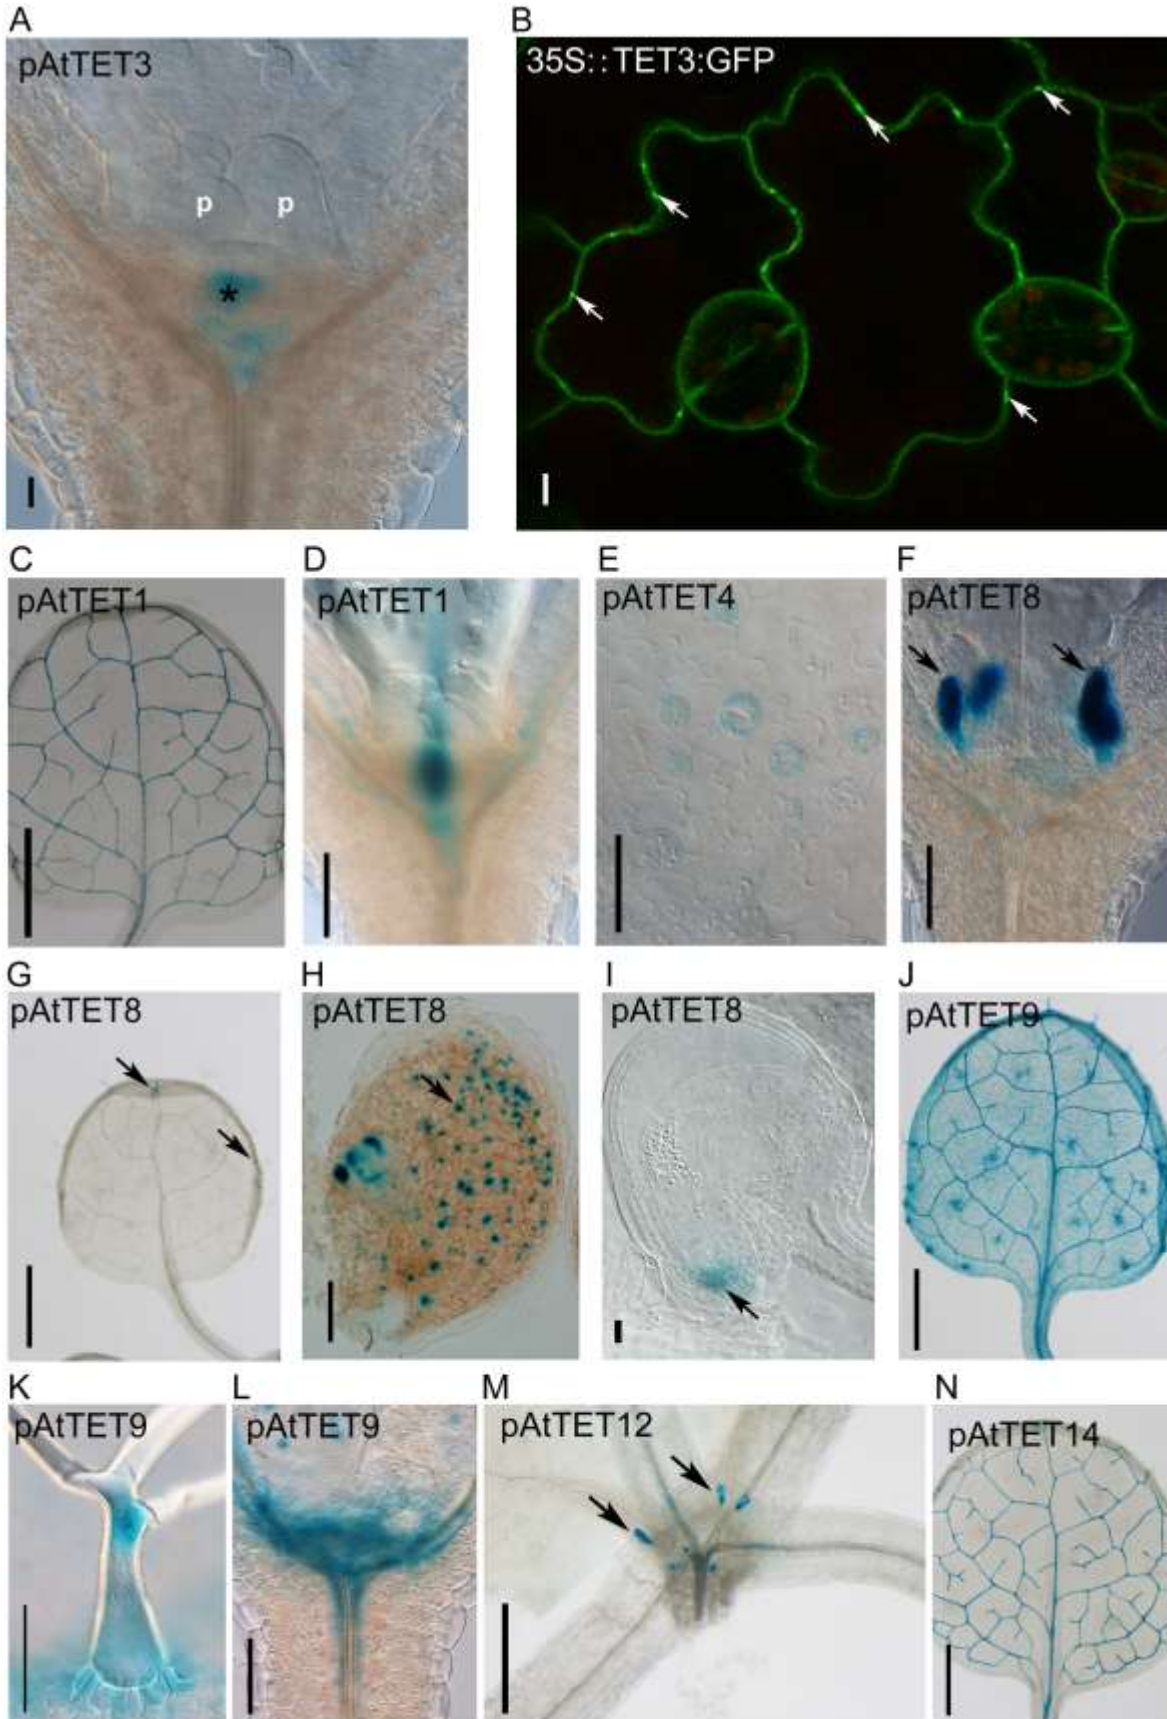

**Supplemental Figure S1.** *TET* expression in seedlings, seeds and TET3 protein localization. Transgenic plants shown are: *pAtTET1::NLS-GFP/GUS* (C and D), *pAtTET3::NLS-GFP/GUS* (A), *p35S::TET3:GFP* (B), *pAtTET4::NLS-GFP/GUS* (E), *pAtTET8::NLS-GFP/GUS* (F-I), *pAtTET9::NLS-GFP/GUS* (J-L), *pAtTET12::NLS-GFP/GUS* (M), and *pAtTET14::NLS-GFP/GUS* (N). A, *TET3* expression in the SAM. p, primordia. Asterisk indicates the *TET3* expression in the SAM organizing center of layer 3. B, TET3 protein localization at the plasmodesmata of cotyledons. Arrows indicate plasmodesmata. C and D, *TET1* expression in the leaf vascular tissue and in the SAM, respectively. E, *TET4* expression in the stomatal guard cells. F-I, *TET8* expression in the stipules, hydathodes, endosperm and presumably synergid cells, respectively, as indicated by arrows in each panel. J-L, *TET9* expression in the leaf, trichome and SAM, respectively. M, *TET12* expression in the stipules, as indicated by arrows. N, *TET14* expression in the leaf vascular tissue. Scale bars represent 5  $\mu$ m (A and B), 1 mm (C, G, J and N), 0.1 mm (D, F, H, K and L), 0.05 mm (E), 0.01 mm (I), and 0.5 mm (M).

A

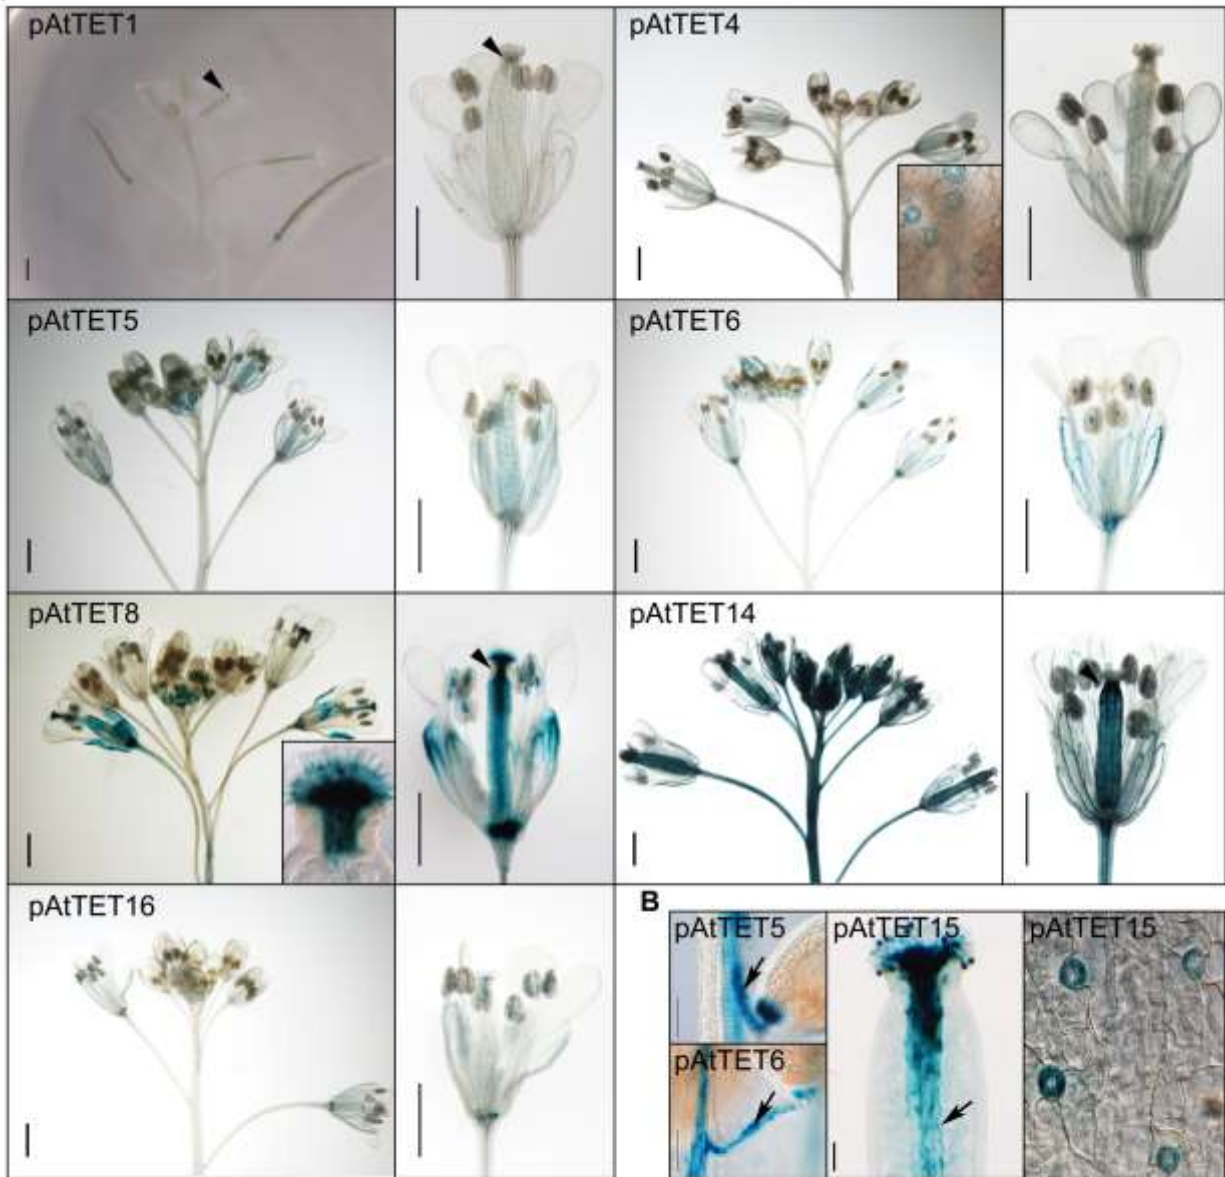

B

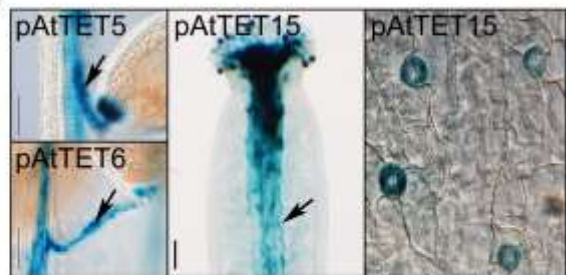

C

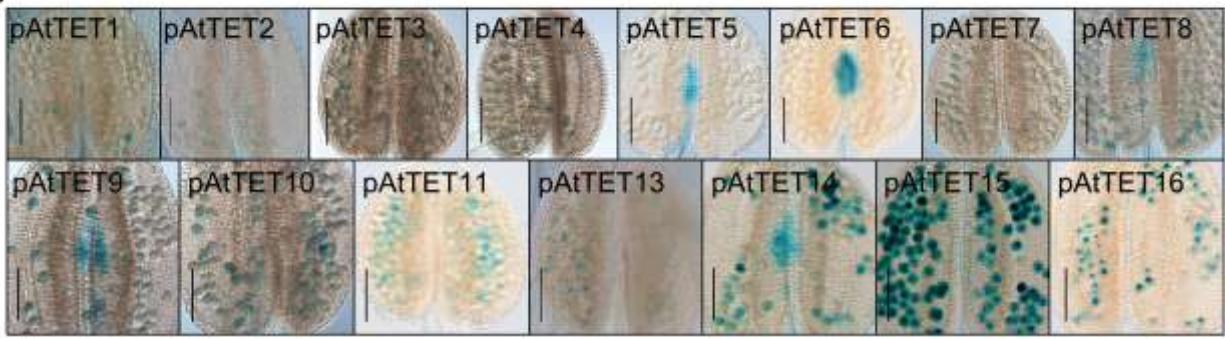

**Supplemental Figure S2.** *TET* expression in flower organs. Transgenic plants shown are: *pAtTET1::NLS-GFP/GUS* (A and C), *pAtTET2::NLS-GFP/GUS* (C), *pAtTET3::NLS-GFP/GUS* (C), *pAtTET4::NLS-GFP/GUS* (A and C), *pAtTET5::NLS-GFP/GUS* (A-C), *pAtTET6::NLS-GFP/GUS* (A-C), *pAtTET7::NLS-GFP/GUS* (C), *pAtTET8::NLS-GFP/GUS* (A and C), *pAtTET9::NLS-GFP/GUS* (C), *pAtTET10::NLS-GFP/GUS* (C), *pAtTET11::NLS-GFP/GUS* (C), *pAtTET13::NLS-GFP/GUS* (C), *pAtTET14::NLS-GFP/GUS* (A and C), *pAtTET15::NLS-GFP/GUS* (B and C), and *pAtTET16::NLS-GFP/GUS* (A and C). A, Overview of whole inflorescences and single flowers. Arrowheads indicate the stigma transmitting tract. Insets in *pAtTET4* and *pAtTET8* show stomatal guard cells at the anther, and the magnification of the stigma and transmitting tissue, respectively. B, *TET5* and *TET6* expression in the funiculus. *TET15* activity in the pollen tube and stomatal guard cells of the sepal. C, *TET* expression in the pollen and stamen filament tissues. Scale bars represent 1 mm (A), and 0.1 mm (B and C).

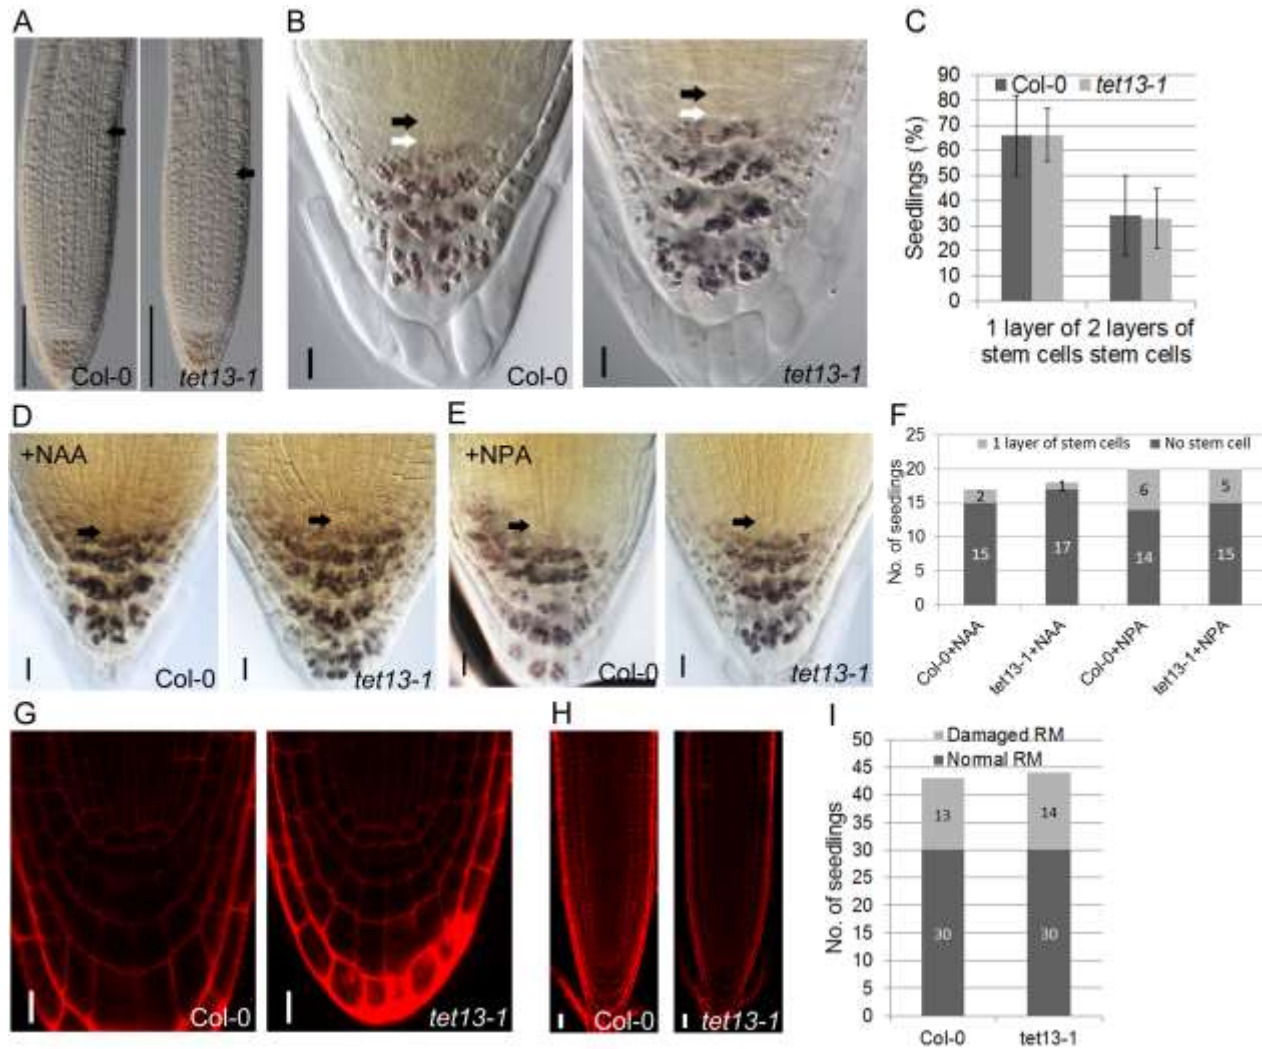

**Supplemental Figure S3.** *tet13-1* primary root morphology. A, Root meristem size of 6-d-old seedlings. Means are presented  $\pm$  sd (n=28-39). Arrows indicate the boundary between the root meristem and the transition zone. B and C, Lugol solution staining of starch in differentiated columella cells (B) and quantification of seedlings showing one or two layers of stem cells (C). Means are presented  $\pm$  sd (n=125-130). Black and white arrows indicate QC and the columella initial cells, respectively. D-F, Lugol solution staining of starch in differentiated columella cells after treatment with NAA (D) or NPA (E) and quantification of seedlings showing one or no layer of stem cells (F). Five-d-old seedlings growing under 24-h light conditions were transferred onto medium containing 1  $\mu$ M NAA or 1  $\mu$ M NPA for 24 h. Black arrows indicate the QC. G, Organization of QC and columella cells. The root was counterstained with propidium iodide. H

and I, Root meristem (H) and quantification of seedlings showing dead cells in the RM (I) after hydroxyurea treatment. Six-d-old seedlings growing under 24-h light conditions were transferred onto medium containing 1mM hydroxyurea for 24 h. The root was counterstained with propidium iodide. Scale bars represent 0.1 mm (A and G), 0.01 mm (B, D and E), and 0.02 mm (H).

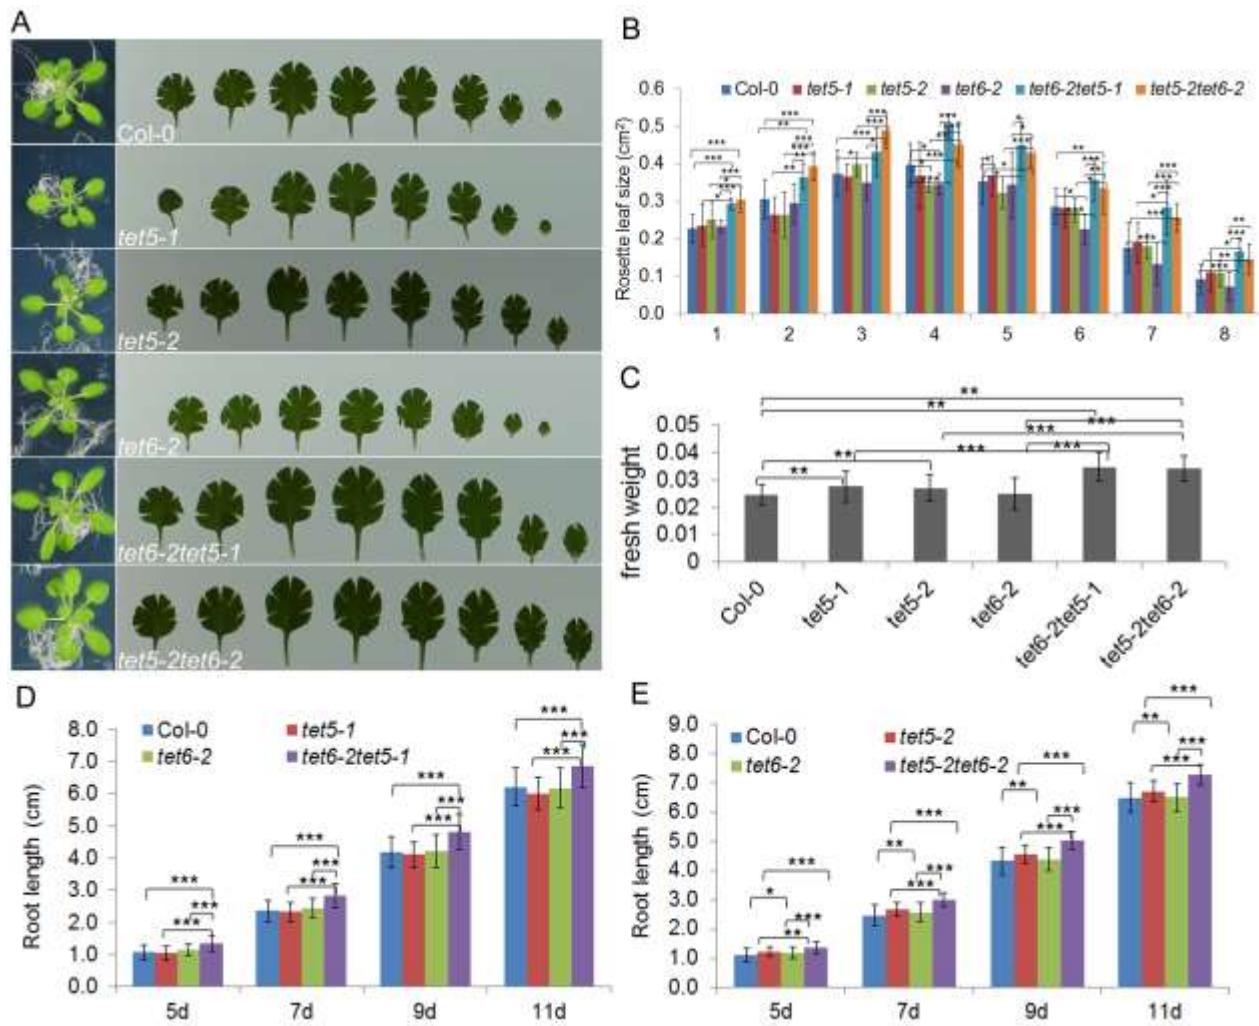

**Supplemental Figure S4.** *tet5* and *tet6* single and double mutant phenotypes in other alleles. A, Rosette and leaf series of 21-d-old seedlings. From left to right were leaf 1 to leaf 8, incisions were made to make the leaves fully expanded when necessary. B, Quantification of the rosette leaf size in A. Means are presented  $\pm$  sd (n=8-10). C, Fresh weight of 21-d-old seedlings. Only rosette leaves were used for the experiment. D and E, Primary root growth kinetics (root length). Means are presented  $\pm$  sd (n=31-39). Asterisks in all graphs mark significant differences: \* $p < 0.05$ , \*\* $p < 0.01$  and \*\*\* $p < 0.001$ .

A

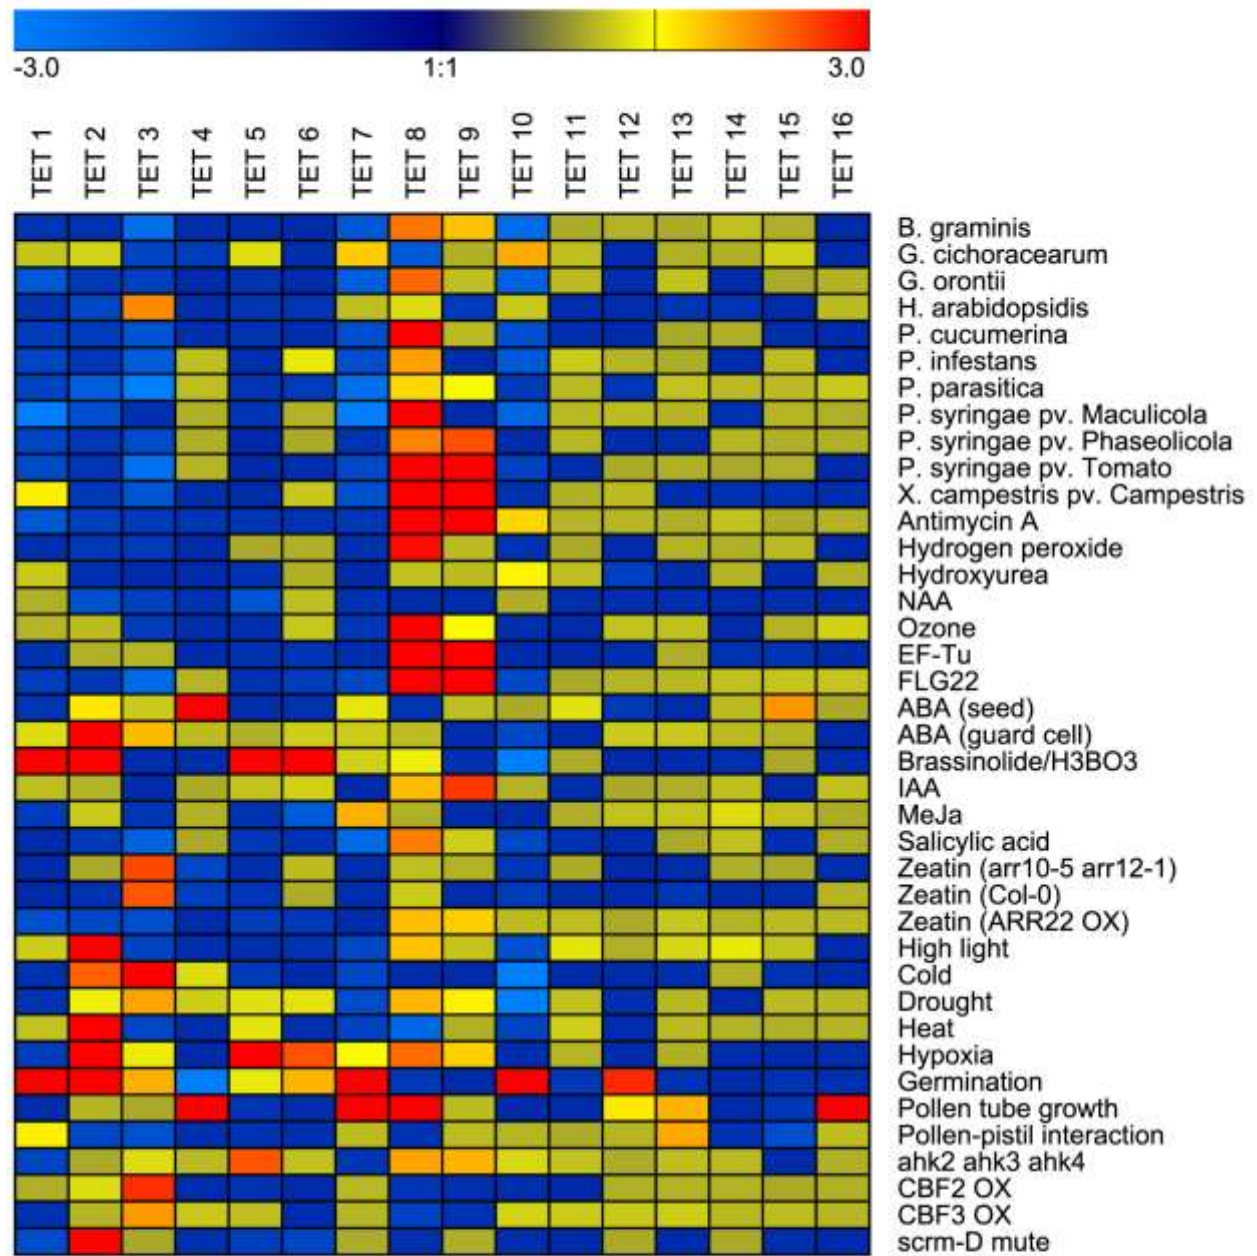

B

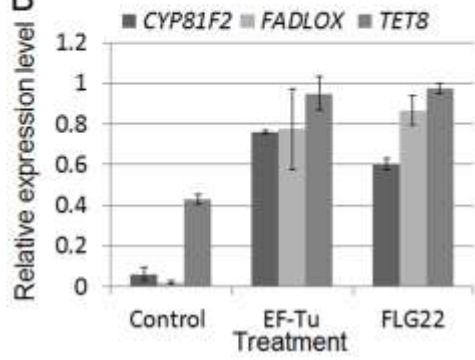



**Supplemental Figure S5.** Heat map of *TET* response to different perturbations and *TET8* expression levels after elicitors treatment. A, The perturbations were collected from the dataset in Genevestigator. Orange/yellow and blue colors represent up- and down-regulation, respectively. Color scale represents fold-change between -3.0 and 3.0, the values beyond this range are shown in the same color as -3.0 and 3.0. B, *TET8* expression levels measured by qRT-PCR after 2-h mock or elicitor treatment at the concentration of 1  $\mu$ M. *CYP81F2* and *FADLOX* genes were used as positive control (Denoux et al., 2008). Means are presented  $\pm$  sd.

**Supplemental Table S1.** *tet* mutants collected in this study. Only the GT line of *TET13* is a transposon insertion mutant, the rest are T-DNA insertions. SALK and GABI lines are in the Columbia (Col) background and ordered from NASC (<http://arabidopsis.info/>), FLAG lines are in the Wassilewskija (Ws) background and ordered from INRC (<http://publiclines.versailles.inra.fr/>), the GT line is in the Landsberg *erecta* (*Ler*) background and ordered from CSHL (<http://genetrapp.cshl.edu/TrHome.html>). GABI lines' second insertion information is obtained according to the segregation analysis from the GABI website (<http://www.gabi-kat.de/>). Plant samples harvested for qRT-PCR in this study were 7-d-old seedlings growing vertically under 24-h light conditions, except for *tet13-2*, for which inflorescences were harvested. pro, promoter. HM, homozygous. HZ, heterozygous. S, sensitive to plant selective antibiotics (SALK and GT: kanamycin 50 mg/L, GABI: sulfadiazin 7.5 mg/L, FLAG: DL-phosphinothricin 50 µM/L.). KO, knock-out. D, down-regulated. U, up-regulated. NC, no change. B, results from Boavida *et al.*, 2013. E, embryo. R, root. C, cotyledon. L, rosette leaf. F, flower. LR, lateral root. LRP, lateral root primordia.

| AGI code  | Gene        | Seed stock   | Allele        | T-DNA insertion | Pedigree and antibiotic resistance | qRT-PCR result | Gene expression                            | Phenotype                                                                                     |
|-----------|-------------|--------------|---------------|-----------------|------------------------------------|----------------|--------------------------------------------|-----------------------------------------------------------------------------------------------|
| AT5G46700 | <i>TET1</i> | GK-254G01.02 | <i>trn2-7</i> | exon 1          |                                    |                | E, R, C, L, F.                             | Altered leaf patterning and symmetry                                                          |
| AT2G19580 | <i>TET2</i> | GK-967G02.01 | <i>tet2-1</i> | intron 2        | HM                                 | KO             | C, L, F, meristemoid, stomatal guard cell. | Narrow leaves, reduced leaf area                                                              |
|           |             | SALK_101340C | <i>tet2-2</i> | intron 2        | HM. S                              | D              |                                            | No phenotype in leaf                                                                          |
| AT3G45600 | <i>TET3</i> | SALK_116766C | <i>tet3-1</i> | intron          | HM. S                              | D              | E, R, F, SAM organizing center.            | No phenotype in primary root length, flowering time or leaf morphology under normal condition |
|           |             | GK-026G04.01 | <i>tet3-2</i> | intron          | HM, 2nd insertion                  | U              |                                            | No phenotype in primary root length, flowering time or leaf morphology under normal condition |

|           |              |              |                |        |       |                    |                                            |                                                                          |
|-----------|--------------|--------------|----------------|--------|-------|--------------------|--------------------------------------------|--------------------------------------------------------------------------|
|           |              | FLAG_306C01  | <i>tet3-3</i>  | exon 1 | HM    | KO <sup>B</sup>    |                                            | No phenotype in flowering time or leaf morphology under normal condition |
|           |              | FLAG_421H09  | <i>tet3-4</i>  | exon 1 | HM    | KO <sup>B</sup>    |                                            | No phenotype in flowering time or leaf morphology under normal condition |
| AT5G60220 | <i>TET4</i>  | SALK_076971C |                | prom   | HM. S | D                  | E, R, C, F.                                | No phenotype in primary root length                                      |
|           |              | GK-290A02.01 | <i>tet5-1</i>  | prom   | HM    | D                  | E, R, C, L, F.                             | No phenotype in seedling                                                 |
| AT4G23410 | <i>TET5</i>  | SALK_148216  | <i>tet5-2</i>  | exon 1 | HM    | KO                 |                                            | No phenotype in seedling                                                 |
|           |              | SALK_020009C | <i>tet5-3</i>  | exon 2 | HM    | KO                 |                                            | No phenotype in seedling                                                 |
| AT3G12090 | <i>TET6</i>  | SALK_139305  | <i>tet6-2</i>  | prom   | HM    | D                  | R, C, L, F.                                | No phenotype in seedling                                                 |
| AT2G23810 | <i>TET8</i>  | SALK_136039C | <i>tet8-1</i>  | exon 1 | HM. S | D; KO <sup>B</sup> | E, R, C, L, F.                             | No phenotype in primary root length                                      |
| AT4G30430 | <i>TET9</i>  | GK-207H01.01 | <i>tet9-1</i>  | 3' UTR | HM    | U                  | R, C, L, F, trichome precursors, trichome. | No trichome morphology phenotype                                         |
| AT1G63260 | <i>TET10</i> | SALK_120966C |                | prom   | HM    | U                  | E, R, F.                                   | No phenotype in primary root length                                      |
| AT2G03840 | <i>TET13</i> | SALK_011012C | <i>tet13-1</i> | exon 1 | HM    | KO <sup>B</sup>    | F, QC, LR founder cell, LRP.               | Reduced primary root length, root apical meristem size and LR density    |
|           |              | GT8699       | <i>tet13-2</i> | exon 1 | HM    | U                  |                                            | No root phenotype                                                        |
| AT5G57810 | <i>TET15</i> | GK-513E06.01 |                | exon 2 | HM    | U                  | E, R, F.                                   | No phenotype in primary root length                                      |

**Supplemental Table S2.** *TET* cis-regulatory element information

See Supplemental Table S2.xlsx file.

FDR, false discovery rate. DH, DNase I hypersensitive site. "SRP" and "GSE" codes refer to Heyndrickx et al., 2014; strong positions in the matrix are in upper case.

**Supplemental Table S3.** Primers used in the study.

| <b>Primer Name</b> | <b>Sequence (5'-3')</b>                                      | <b>Purpose</b>   |
|--------------------|--------------------------------------------------------------|------------------|
| pAtTET1attB4F      | GGGGACAACCTTTGTATAGAAAAGTTGGAATAGTAATTAAGTTATAAATTAGTACACTTG | promoter cloning |
| pAtTET1attB1R      | GGGGACTGCTTTTTTGTACAAACTTGTCTTTTTTGGGAGAGATGAGAG             | promoter cloning |
| pAtTET2attB4F      | GGGGACAACCTTTGTATAGAAAAGTTGGAGATGCATCTGGAATTTGACG            | promoter cloning |
| pAtTET2attB1R      | GGGGACTGCTTTTTTGTACAAACTTGTTAAATTTTCTCTCTCTCTCTCTCT          | promoter cloning |
| pAtTET3attB4F      | GGGGACAACCTTTGTATAGAAAAGTTGGATAGAAATGTGTGTATTTCAGTAAGG       | promoter cloning |
| pAtTET3attB1R      | GGGGACTGCTTTTTTGTACAAACTTGTAGCTTAGGGTTTTGAGGTTTTTC           | promoter cloning |
| pAtTET4attB4F      | GGGGACAACCTTTGTATAGAAAAGTTGGACTACATTTTCCAGGAAAAGCTAATG       | promoter cloning |
| pAtTET4attB1R      | GGGGACTGCTTTTTTGTACAAACTTGTGGCGATTTTGTTTTTTGTGAATATG         | promoter cloning |
| pAtTET5attB4F      | GGGGACAACCTTTGTATAGAAAAGTTGGAAGTTTCCATACATATTCTCTG           | promoter cloning |
| pAtTET5attB1R      | GGGGACTGCTTTTTTGTACAAACTTGTTCCTTCTCTCCTTTTTT                 | promoter cloning |
| pAtTET6attB4F      | GGGGACAACCTTTGTATAGAAAAGTTGGATGCCTCTTCTTTGTTTTTAAATG         | promoter cloning |
| pAtTET6attB1R      | GGGGACTGCTTTTTTGTACAAACTTGTAGTAGTAATGTTATCAAGAAG             | promoter cloning |
| pAtTET7attB4F      | GGGGACAACCTTTGTATAGAAAAGTTGGATTCACACAAGAATCTCTCTT            | promoter cloning |
| pAtTET7attB1R      | GGGGACTGCTTTTTTGTACAAACTTGTTCGCTTTTTTGTTCGGCGG               | promoter cloning |
| pAtTET8attB4F      | GGGGACAACCTTTGTATAGAAAAGTTGGAAAATTTAAAATAGTGCTTCAAAG         | promoter cloning |
| pAtTET8attB1R      | GGGGACTGCTTTTTTGTACAAACTTGTGGTTTAGATTTCAGAGAGAAAG            | promoter cloning |
| pAtTET9attB4F      | GGGGACAACCTTTGTATAGAAAAGTTGGACCGTACTATTATTATTATTTTTA         | promoter cloning |
| pAtTET9attB1R      | GGGGACTGCTTTTTTGTACAAACTTGTGGTGATGATTGAAGAAG                 | promoter cloning |
| pAtTET10attB4F     | GGGGACAACCTTTGTATAGAAAAGTTGGATAGAAGAATCAAAGAGAG              | promoter cloning |
| pAtTET10attB1R     | GGGGACTGCTTTTTTGTACAAACTTGTTCAGGTTGTTGCTTTTTG                | promoter cloning |
| pAtTET11attB4F     | GGGGACAACCTTTGTATAGAAAAGTTGGATTTTCAATTTTCCATATCAAATG         | promoter cloning |
| pAtTET11attB1R     | GGGGACTGCTTTTTTGTACAAACTTGTTCAGGAAATTTGCTTTCTCC              | promoter cloning |
| pAtTET12attB4F     | GGGGACAACCTTTGTATAGAAAAGTTGGAATAGTCATATGGAAATTATTTG          | promoter cloning |
| pAtTET12attB1R     | GGGGACTGCTTTTTTGTACAAACTTGTGTTTATCGGCGGTTATTTG               | promoter cloning |
| pAtTET13attB4F     | GGGGACAACCTTTGTATAGAAAAGTTGGAAAACATTATATTATTTCAAATA          | promoter cloning |
| pAtTET13attB1R     | GGGGACTGCTTTTTTGTACAAACTTGTATCGTGTAAGAGAAAGGG                | promoter cloning |

|                |                                                                         |                  |
|----------------|-------------------------------------------------------------------------|------------------|
| pAtTET14attB4F | GGGGACAACCTTTGTATAGAAAAGTTGGATGCTTCTTTTTCAAAGAGTG                       | promoter cloning |
| pAtTET14attB1R | GGGGACTGCTTTTTTGTACAAACTTGTTATTGGAGAGCTTCAAGGACAG                       | promoter cloning |
| pAtTET15attB4F | GGGGACAACCTTTGTATAGAAAAGTTGGAGGCTGATCTGATCAATGAATTG                     | promoter cloning |
| pAtTET15attB1R | GGGGACTGCTTTTTTGTACAAACTTGTTGTGAAAGTGAAAGAAAAG                          | promoter cloning |
| pAtTET16attB4F | GGGGACAACCTTTGTATAGAAAAGTTGGAATTAATAATCTTTCCGG                          | promoter cloning |
| pAtTET16attB1R | GGGGACTGCTTTTTTGTACAAACTTGTTGTTAAGAACCCTGTTCG                           | promoter cloning |
| pAtTET17attB4F | GGGGACAACCTTTGTATAGAAAAGTTGGAAGAAAATCTTACCTGCAAATCTCAG                  | promoter cloning |
| pAtTET17attB1R | GGGGACTGCTTTTTTGTACAAACTTGTTGTTGTTTTTTGGTATAGACCTG                      | promoter cloning |
| qPP2A_F        | TAACGTGGCCAAAATGATGC                                                    | qRT-PCR          |
| qPP2A_R        | GTTCTCCACAACCGCTTGGT                                                    | qRT-PCR          |
| qUBC_F         | CTGCGACTCAGGGAATCTTCTAA                                                 | qRT-PCR          |
| qUBC_R         | TTGTGCCATTGAATTGAACCC                                                   | qRT-PCR          |
| TET5 qPCR_F    | TACTGTGTTGGCTGTTGCG                                                     | qRT-PCR          |
| TET5 qPCR_R    | GACTGTTCCCATCCAGGTCT                                                    | qRT-PCR          |
| TET6 qPCR_F    | CAGCTCATCCTTACCATCCA                                                    | qRT-PCR          |
| TET6 qPCR_R    | CCACCAGTAATAGTCCCAACG                                                   | qRT-PCR          |
| TET3 attB1F    | GGGGACAAGTTTGTACAAAAAAGCAGGCTTAGAAGGAGATAGAACCATGAGAACAAGCAACCATCTCATAG | gene cloning     |
| TET3 attB2R    | GGGGACCACTTTGTACAAGAAAGCTGGGTCAAGATGGAAATGACTAGGATGTG                   | gene cloning     |
| TET13 attB1F   | GGGGACAAGTTTGTACAAAAAAGCAGGCTTAGAAGGAGATAGAACCATGGCGAGAGATAAAGAAGATC    | gene cloning     |
| TET13 attB2R   | GGGGACCACTTTGTACAAGAAAGCTGGGTCTTATTTCTGACTTTCTCGAAGG                    | gene cloning     |
| Bar_F          | GCCACCGAGGCGGACATG                                                      | genotyping       |
| Bar_R          | GGGCAGCCCGATGACAGC                                                      | genotyping       |

**Supplemental Movie S1.** TET3-GFP movement on the plasma membrane.

See Supplemental Movie S1.avi file.

### **Supplemental Reference**

**Denoux C, Galletti R, Mammarella N, Gopalan S, Werck D, De Lorenzo G, Ferrari S, Ausubel FM, Dewdney J (2008)** Activation of defense response pathways by OGs and Flg22 elicitors in *Arabidopsis* seedlings. *Mol Plant* **1**: 423-445
